# Supplementary material for: Phylogenetic and functional characterisation of the Haemophilus influenzae multidrug efflux pump AcrB
Source: PubMed Central journal article supplement (PMC6744504; doi:10.1038/s42003-019-0564-6), 2019-09-13
Supplement: 42003_2019_564_MOESM1_ESM.pdf [file 42003_2019_564_MOESM1_ESM.pdf]

## Supplementary Figures

| Score          | Expect                                                                                                                   | Method                       | Identities    | Positives     | Gaps        |
|----------------|--------------------------------------------------------------------------------------------------------------------------|------------------------------|---------------|---------------|-------------|
| 483 bits(1242) | 1e-157                                                                                                                   | Compositional matrix adjust. | 329/1028(32%) | 540/1028(52%) | 44/1028(4%) |
| Query 11       | DIFIRRPVLAVSISLLMIILGLQAIKSLAVREYPKMTTITVITVSTAYPGADANLIQAFVT                                                            |                              |               | 70            |             |
| Sbjct 3        | + FI RP+ A I+++++ G AI KL V +YP + +T+S +YPGADA +Q VT<br>NFFIDRPIFAWVIAIIIMLAGGLAILKLPVAQYPTIAPPAVTISASYPGADAKTVQDTVT     |                              |               | 62            |             |
| Query 71       | SKLEESIAQADNIDYMSSTSAPSSST-ITIKMKLNTPAGALADVLAQVAVKSNALPNGI                                                              |                              |               | 129           |             |
| Sbjct 63       | +E+++ DN+ YMSS S + + IT+ + TD A V K+ LP +<br>QVIEQNMNGIDNLMYSSNSDSTGTQITLTFESGTDADIAQVQVQNKQLLAMPPLPQEV                  |                              |               | 122           |             |
| Query 130      | EDPSVS-SSSSGGSGIMYISF--RSKLDSSQVTDYINRVVVKPQFFTIEGVAEVQVFGAAE                                                            |                              |               | 186           |             |
| Sbjct 123      | + VS S S +M + + ++DY+ +K GV +VQ+FG+ +<br>QQQGVSVKSSSSFLMVVGVINTDGTMTQEDISDYVAANMKDAISRTSGVGDVQLFGS-Q                     |                              |               | 181           |             |
| Query 187      | YALRIWLDPQKMAAQNLSVPTVMSALSANNVQTAAGNDNGYVYRNKV-----ETTTK                                                                |                              |               | 240           |             |
| Sbjct 182      | YA+RW++P ++ L+ V++A+ A N Q AAG G ++ +T<br>YAMRWMNPNELNKFQLTPVDVITAIKAQNAQVAAGQLGGTPPVKQQLNASIIAQTRLT                     |                              |               | 241           |             |
| Query 241      | SVEQLSNLISSNGD-DLVRLRDIAVELNKENDNSRATANGAESVVLAINPTSTANPLT                                                               |                              |               | 299           |             |
| Sbjct 242      | S E+ +++ N D V LRD+A +EL EN + A NG + L I + AN L<br>STEEFQKILLKVNQDGRSVLLRDVAKIELGGENYDIIAEFNGQPASGLGIKLATGANALD          |                              |               | 301           |             |
| Query 300      | VAEKIRPLYESIKTQLPDSMESDILYDRITAINSSIHEVIKTIGEATLIVLVILMFIGS                                                              |                              |               | 359           |             |
| Sbjct 302      | A IR ++ P ++ YD T + SIHEV+KT+ EA ++V +V+ +F+ +<br>TAAAIRAELAKMEFFPSPGLKIVYPYDTPFVKISIEHEVVKTLVEAILLVFLVMYLFQNL           |                              |               | 361           |             |
| Query 360      | FRAILPILAIPIISLIGVLMQLSFPNFSINLMTLLALILAIIGLVDDAIVVLENIDRHI-                                                             |                              |               | 418           |             |
| Sbjct 362      | FRA LIP +A+P+ L+G +L +F FSIN +T+ ++LAIGL+VDDAIVV+EN+R +<br>FRATLIPITIAVPVLLGTFAVLAAGFSGINTLTMFGMVLAIIGLLVDDAIVVVENVERVMA |                              |               | 421           |             |
| Query 419      | KAGETPFRAAIIGTREIAVPIVSMITIALIAVYSPMALMGGITGTLFKEFALTLAGAVFIS                                                            |                              |               | 478           |             |
| Sbjct 422      | + G P A +I ++ + + L AV+ PMA GG TG ++++++T+ A+ +S<br>EGLPPKEATRKSQMGQIQQALVGIAMVLSAVFVPMAFFGGSTGAIYRQFSITIVSAMALS         |                              |               | 481           |             |
| Query 479      | GVVALTSLPMMSSKLLKSNAPKPTWMEERVEHTLGVNRYE----YMLDLV---MLNRKS                                                              |                              |               | 531           |             |
| Sbjct 482      | +VAL L+P + +LK AK E + + G NR++E + D V + +<br>VLVALILLPALCATMLKPIAKGDHGEK-KGFFGWFNRMFEKSTHHTYDSVGGILRSTGR                 |                              |               | 540           |             |
| Query 532      | MLAFAVVIFSTLPFLFNSLSSELTTPNEDKGFIAIGNAPSSVNVYIQNAMQP----YM-                                                              |                              |               | 586           |             |
| Sbjct 541      | L ++I + +LF L S P+ED+G F+ + P+ + Q + Y+<br>YLVLVLIIVVGMAYLFLVRLPSSFLPDEDQGVFMTMVQLPAGATQERTQKVLNEVTHYYLT                 |                              |               | 600           |             |
| Query 587      | --KNVETPEVSEFGMSIAGAPTSNSSLNIITLKDWER---SRKQSAIMNEINEKAKSIP                                                              |                              |               | 641           |             |
| Sbjct 601      | KN +E+ G AG N+ + ++LKDW +R K AI I<br>KEKNVNESVFAVNGFGFAGR-QQNTGIAFVSLKDWADRPGEENKVEAITMRATRAFSSQIK                       |                              |               | 659           |             |
| Query 642      | EVSVSAFNIP---EIDTGEQPPVSVLKTQDYKSLANTAEKFLS-AMKASGKFIYTNL                                                                |                              |               | 697           |             |
| Sbjct 660      | + V AFN+P E+ T G ++ + ++ L + L+ A K<br>DAMVFAFNLPALVELGTA-TGDFDFELIDQAGLHEKLTQARNQLLAEAAKHPDMLTSVRP                      |                              |               | 718           |             |
| Query 698      | DLTYDTAQMITSVDKEKAGTYGITMQQISNTLGSFLSGATVTRVDVGRAYKVISQVKRD                                                              |                              |               | 757           |             |
| Sbjct 719      | + DT Q I +D+EKA G+++ I+ TLG+ G+ V GR KV +<br>NGLEDTPOFKIDIDQEKAQALGVSINDINTLGAAGWGSYVNFIDRGRVKKVYVMSEAK                  |                              |               | 778           |             |
| Query 758      | DRLSPESFNYYLTASNGQSVPLSSVISMKLETPQSLRFRSOLNSAEISAVPMPGISSG                                                               |                              |               | 817           |             |
| Sbjct 779      | R+ P+ ++Y+ A++GQ VP S+ S + E L R++ L S EI PG S+G<br>YRMLPDDIGDWVRAADGQMVVPSAFSSSRWEYGSFRLERYNGLPSMEILGQAAPGKSTG          |                              |               | 838           |             |
| Query 818      | DAIAWLQQQATDNLPGQYTFDFKSEARQLVQEGNALAVTFALAVIIIFLVLAIQFESIRD                                                             |                              |               | 877           |             |
| Sbjct 839      | +A+ ++Q A+ LP G +D+ + Q GN +A+++I++FL LA +ES<br>EAMELMEQLAS-KLPTGVGYDWTGMSYQERLSGNQAPSLYASLIVVFLCLAALYESWSI              |                              |               | 897           |             |
| Query 878      | PMVIMISVPLAVSALVSLNLSFFSIAGTTLNIYSQVGLITLVGLITKHGILMCEVAKE                                                               |                              |               | 937           |             |
| Sbjct 898      | P +M+ VPL V GAL++ + G T ++Y QVGL+T +GL K+ IL+ E AK+<br>PFSVMLVPLGVIGALLAA-----TFRGLTNDVYFQVGLLTTIGLSAKNAILIVEFAKD        |                              |               | 951           |             |
| Query 938      | EQLNHGKTRIEAITHAAKVRRLPILMTTAAVMAGLIPLLYATGAGAVSRFSIGIVIVAGL                                                             |                              |               | 997           |             |
| Sbjct 952      | GK IEA A ++RLRPILMT+ A + G++PL+ +TGAG+ ++ ++G ++ G+<br>LMDKEGGLIEATLDAVRMLRLPILMTSLAFILGVMLVISTGAGSGAQNVAVGTGVMGGM       |                              |               | 1011          |             |
| Query 998      | SIGTIFTL 1005                                                                                                            |                              |               |               |             |
| Sbjct 1012     | T+ +<br>VTATVLAI 1019                                                                                                    |                              |               |               |             |

## Supplementary Figure 1. Amino acid sequence alignment of AcrB-Hi and AcrB-Ec.

AcrB-Hi is shown as the top sequence, and AcrB-Ec is shown as the bottom sequence. Red indicates the Phe-rich pit of AcrB-Ec and the corresponding residues in AcrB-Hi.

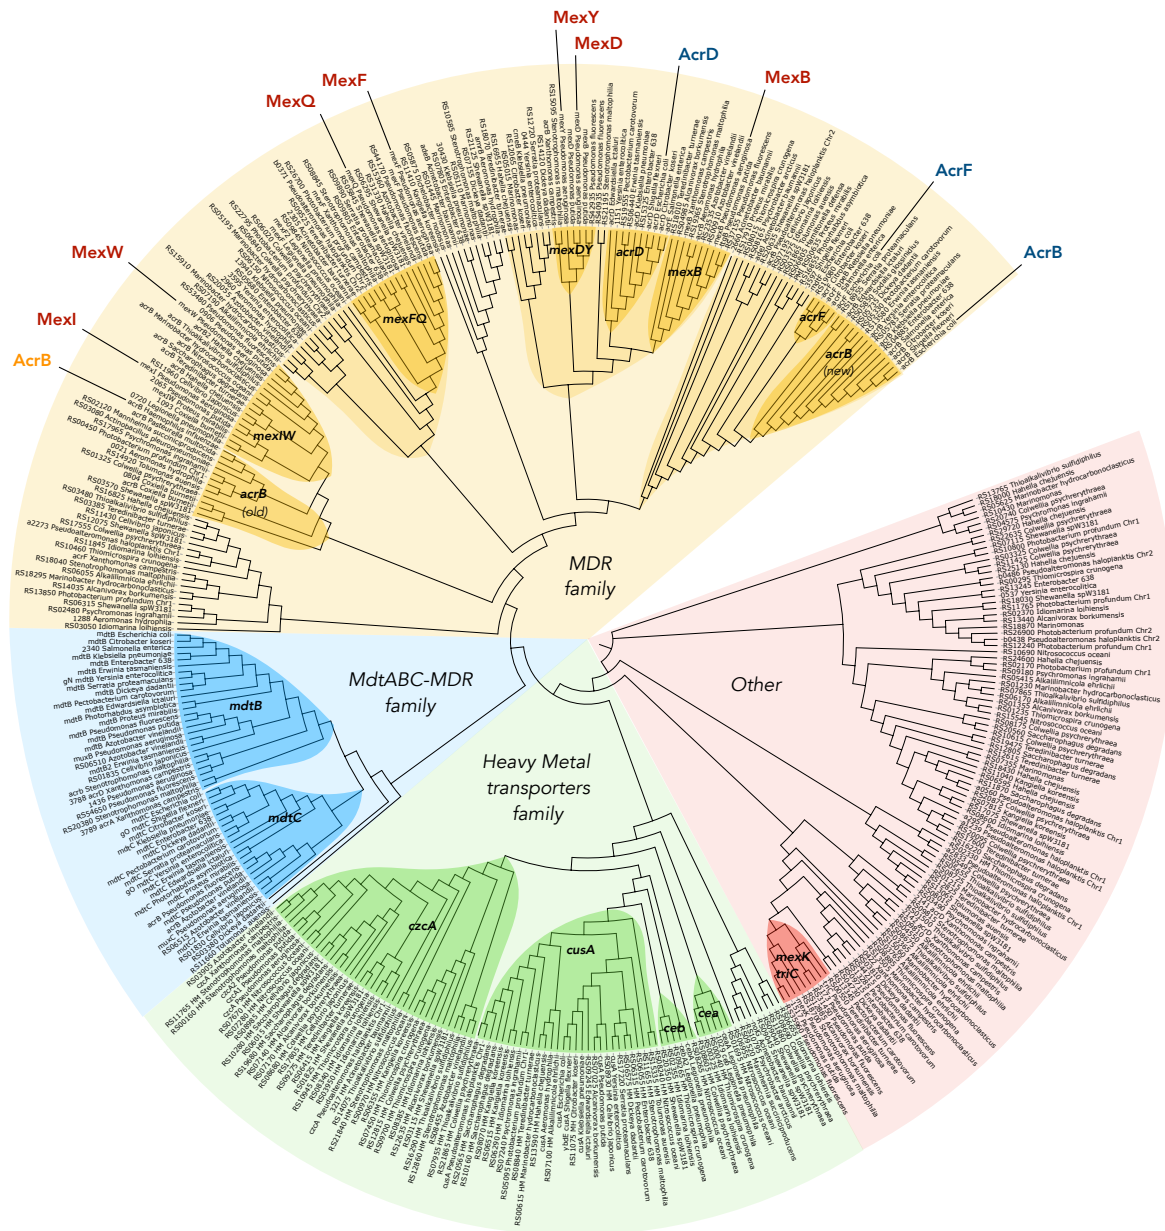

**Supplementary Figure 2. Phylogenetic tree of 393 *acrB*-Ec and *acrB*-Hi homologous genes from 53 gammaproteobacteria.**

Transporters are classified as multi-drug resistant (MDR, yellow), MdtBC-like MDR (blue), heavy metal (green) and other (red). Darker regions show clusters and sub-clusters of RND transporters, with annotations provided (such as *cusA*, *czcA*, *mdtB*, *mdtC*, *acrB*, *mexB*, etc). Gene names are either unidentified, unnamed genes, genes for which the function has been experimentally verified, or for which the function has been estimated based on sequence homology.

Tree scale: 0.1 —

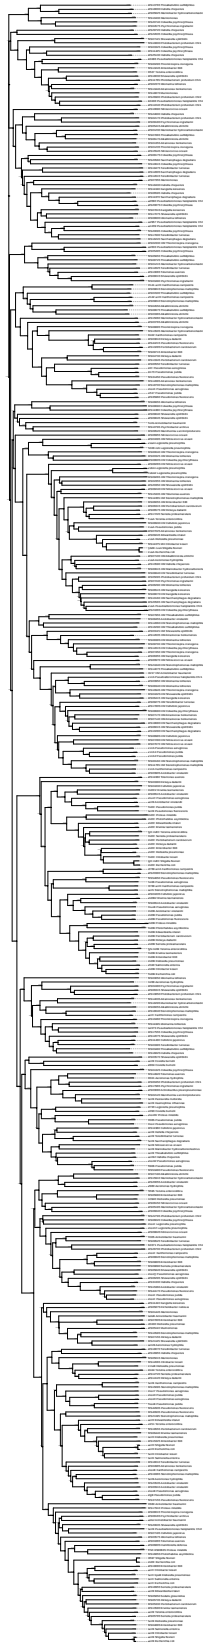

**Supplementary Figure 3. Multiple sequence alignment results shown in a phylogenetic tree provided with branch lengths.**

Gene names are either unidentified, unnamed genes, genes for which the function has been experimentally verified, or for which the function has been estimated based on sequence homology.

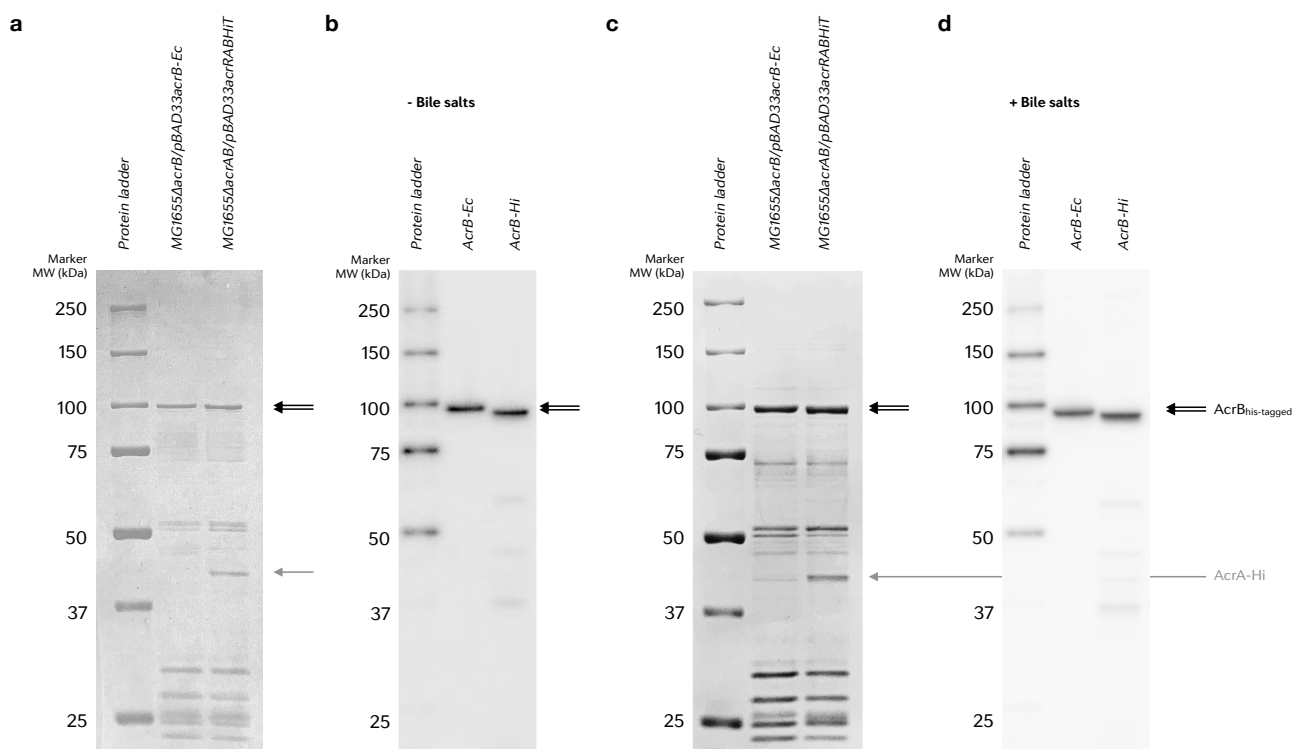

#### Supplementary Figure 4. Expression tests for AcrB-Ec and AcrB-Hi expressed in MG1655 *E. coli* cells.

**a** Coomassie-stained SDS-PAGE gel (10%) of membrane fraction of *E. coli* cells. Left shows AcrB-Ec expressing cells, right shows AcrB-Hi expressing cells. **b** Western blotting analysis of the same SDS-PAGE loaded membrane fractions. **c** Coomassie-stained SDS-PAGE gel of membrane fraction of *E. coli* cells in the presence of bile salts. **d** Western blotting analysis of the membrane fraction of *E. coli* cells grown in the presence of bile salts. For AcrB-Hi, faint lower molecular mass bands are slightly visible, pointing to either some sensitivity to protease activity after cell lysis, or translation initiation at internal methionines from the plasmid. AcrB-Ec and AcrB-Hi are expressed in a similar abundance. When bile salts are added, there is no change in the expression of AcrB-Hi (nor AcrB-Ec). AcrA-Ec has a molecular mass of about 40 kDa, AcrB-Ec and AcrB-Hi have a molecular mass of about 100 kDa. The same amount of protein is loaded on both lanes (the membrane fraction 2  $\mu$ g). Bile salts were added to a final concentration of 1000  $\mu$ g mL<sup>-1</sup>.

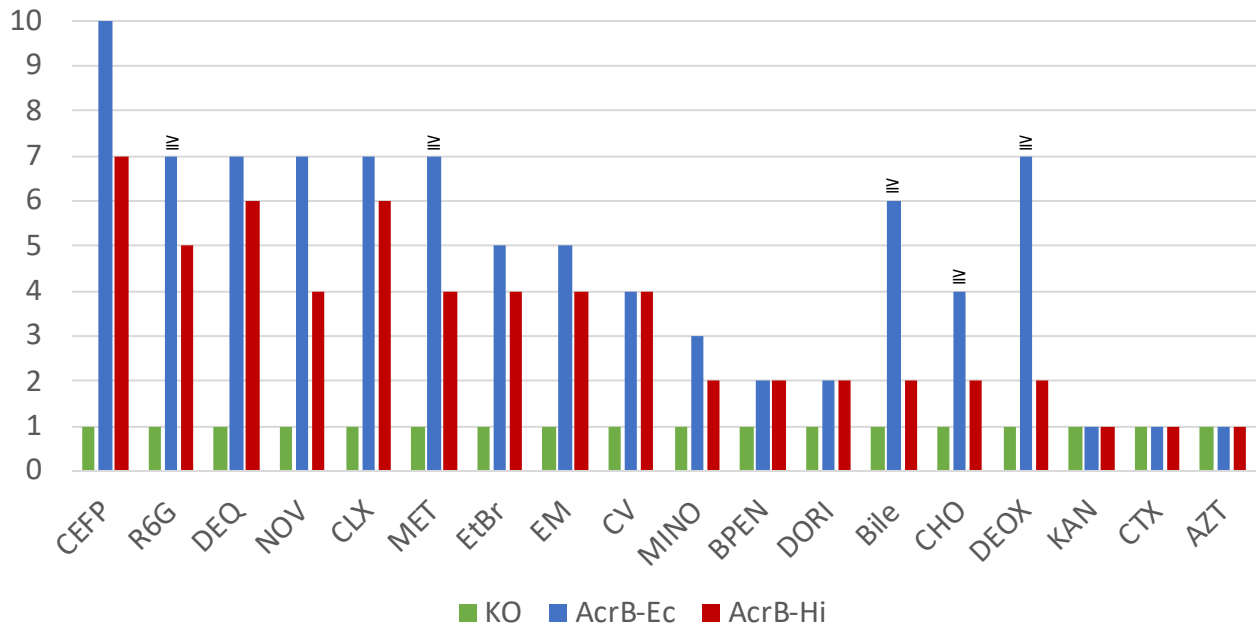

**Supplementary Figure 5. Relative MIC dilution steps provided for all tested drugs.**

Based on MICs seen in Tables 1-3, for *acrB*-KO cells (KO, green), AcrB-Ec (blue) and AcrB-Hi (red) expressing *E. coli* MG1655 $\Delta$ *acr(A)B* cells. *EtBr* ethidium bromide, *R6G* Rhodamine6G, *CV* crystal violet, *MINO* minocycline, *DEQ* dequalinium, *KAN* kanamycin, *EM* erythromycin, *NOV* novobiocin, *CLX* cloxacillin, *BPEN* benzylpenicillin, *MET* methicillin, *CEFP* cefcapene pivoxil, *CTX* ceftriaxone, *DORI* doripenem, *AZT* aztreonam, *CHO* cholic acid, *DEOX* deoxycholic acid. The equal-to-or-larger mark ( $\cong$ ) indicates that the relative MICs could be even higher, as the tested MICs reached their limit.

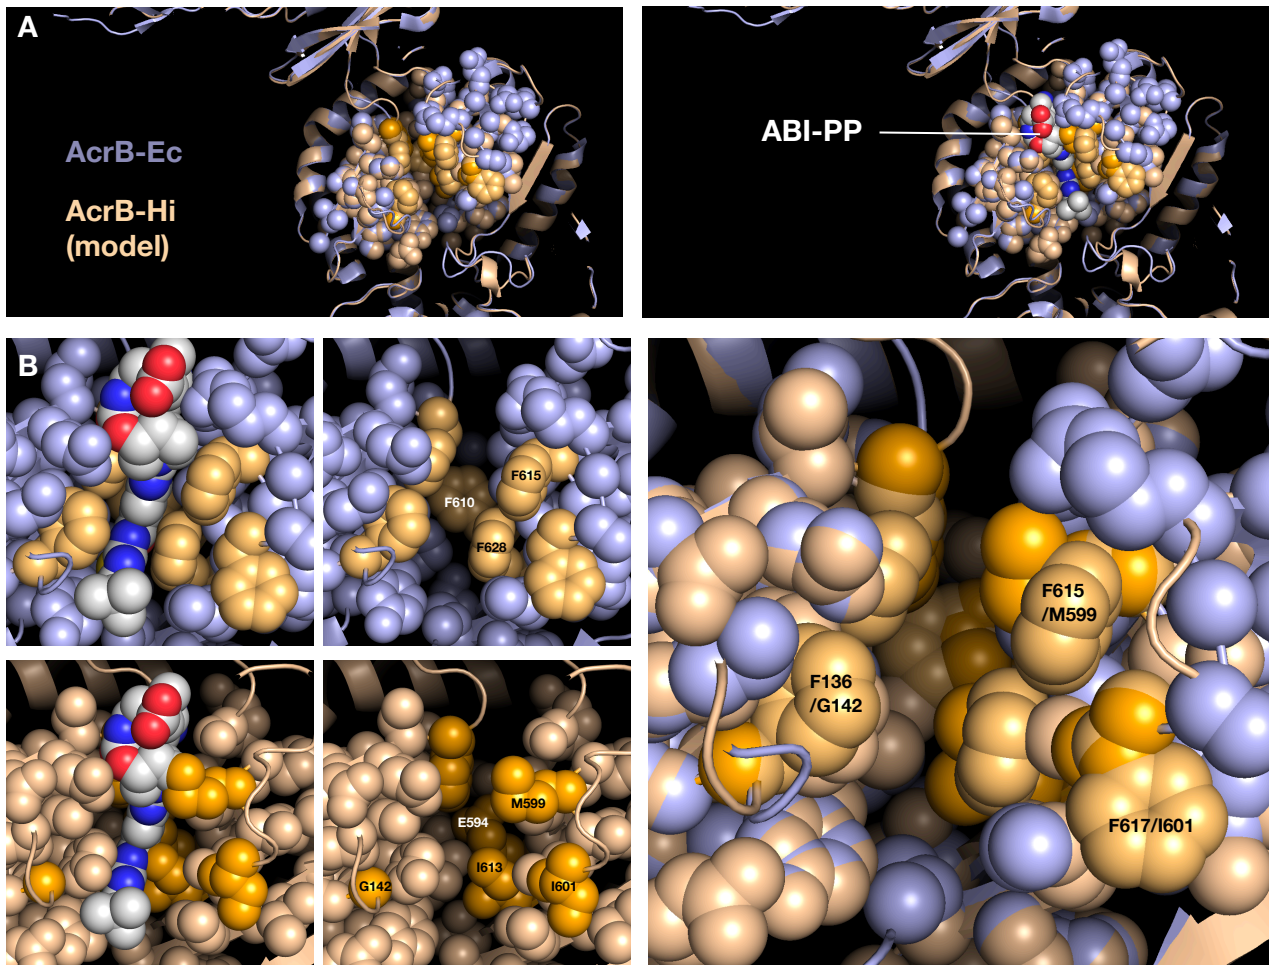

**Supplementary Figure 6. Homology model of the hydrophobic pit of AcrB-Hi.**

**a** AcrB-Ec (light blue) and AcrB-Hi (light orange) are superimposed with and without ABI-PP. Residues around the pit are shown in spheres. ABI-PP is shown in grey spheres. **b** A side view of the hydrophobic pit in both AcrB-Ec (top, light blue) and AcrB-Hi (bottom, light orange). The most left images show ABI-PP superimposed. The image on the right is a superimposed image of the pit of both AcrB-Ec and AcrB-Hi. The darker orange side chains show the Phe-residues of AcrB-Ec, or the corresponding residues in AcrB-Hi. The model was based on PDF identification code 3W9H.

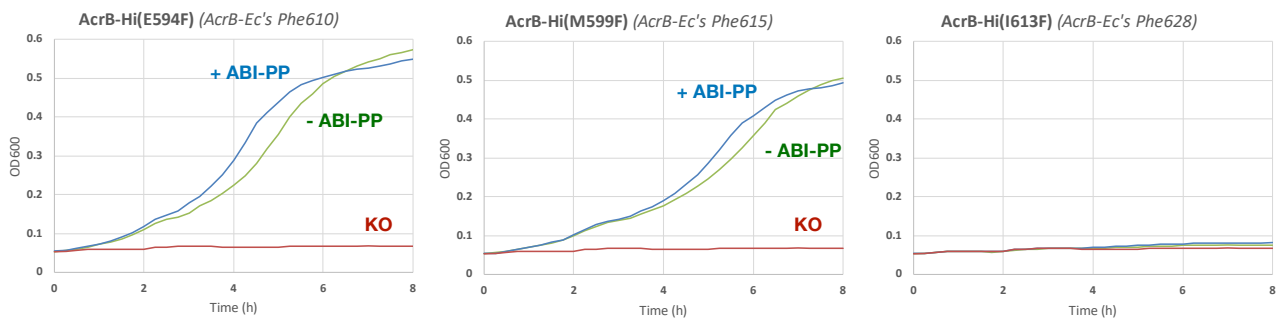

**Supplementary Figure 7. The inhibition by ABI-PP of hydrophobic trap mutants of AcrB-Hi.**

Growth curves of AcrB-Hi mutant expressing *E. coli* cells. Four mutations were tested, namely, Glu594Phe (left), Met599Phe (middle) and Ile613Phe (right). Depicted are the mutant expressing cells without ABI-PP (green), with the addition of ABI-PP (blue) and *acrB*-KO cells (red). All erythromycin concentrations were  $16 \mu\text{g mL}^{-1}$  and ABI-PP concentrations were  $64 \mu\text{g mL}^{-1}$ . Trying higher concentration of EM resulted in growth curves close to KO cells.

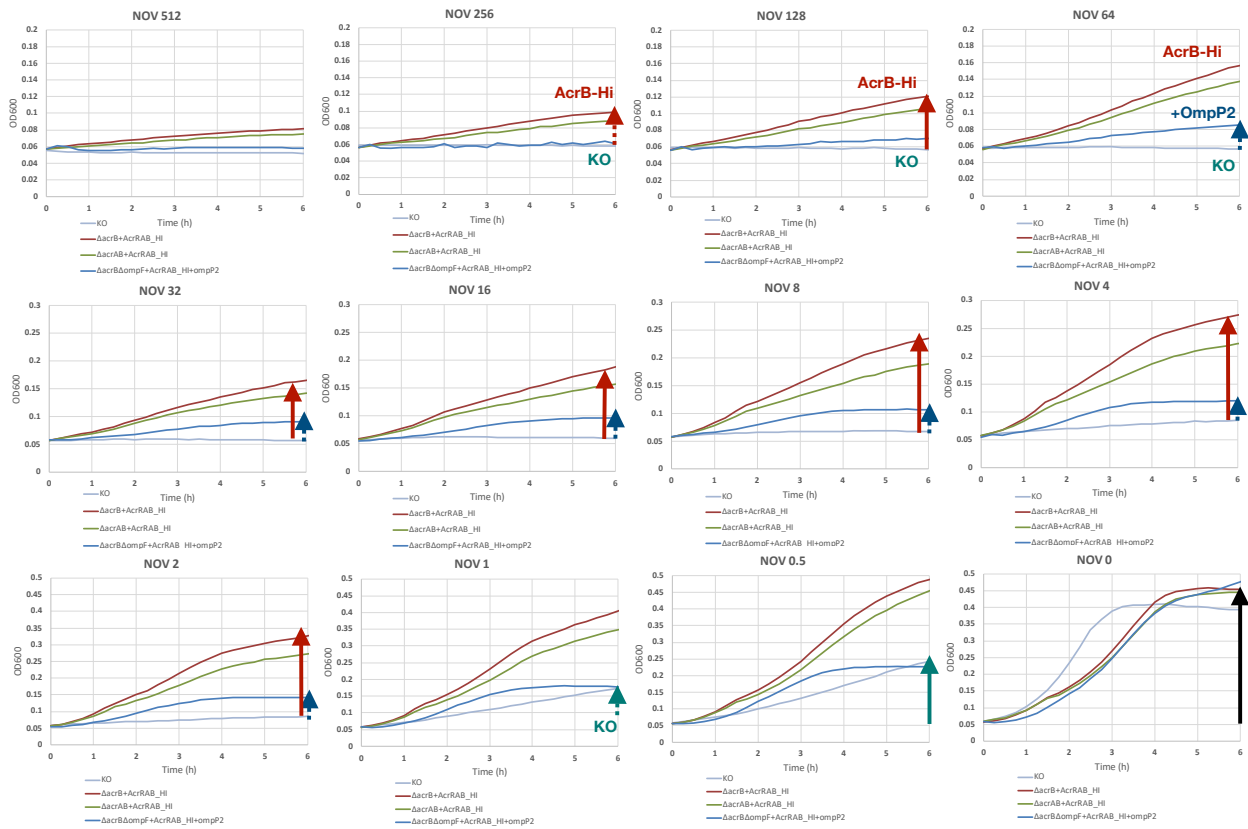

**Supplementary Figure 8. The effect of novobiocin on OmpP2-expressing cells.**

Growth curves for *acrB*- and *ompF*-KO (light blue), AcrRAB-Hi (green, red), and AcrRAB- and OmpP2 (dark blue) expressing *E. coli* C43(DE3) cells. The cells are effected by the expression of OmpP2 under novobiocin exposure for all tested concentrations.



## Supplementary Tables

| Primer name                     | Sequence                                              |
|---------------------------------|-------------------------------------------------------|
| AcrRAB-Hi Forward               | ATCCTCTAGAGTCGACGCTCATTTCATTTTTGAGCAATTATTGCTCCTTATTT |
| AcrRAB-Hi (his6-tagged) Reverse | ATGCCTGCAGGTCGACTTAATGGTGATGGTGATGGTGGTTGTTTTATTTT    |
| OmpP2 Forward                   | GTGCGGCCGCAAGCTTGCGAATCTTTCGATTGCCTTGCTT              |
| OmpP2 Reverse                   | ACAATCCCTCTAGAGGAGAAAAGTTCAATCATAGATAGT               |

**Supplementary Table 1.** Primers used for the amplification of *acrRAB* and *ompP2* from *H. influenzae*. These amplified segments were used for cloning in the designated vectors pBAD33 or pET26b(+).

|      |             |                            | Minimal inhibitory concentration (MIC, µg/mL) |                   |                    |                  |                   |                  |                    |
|------|-------------|----------------------------|-----------------------------------------------|-------------------|--------------------|------------------|-------------------|------------------|--------------------|
|      |             | Strain                     | Plasmid                                       | EtBr              | R6G                | EM               | MET               | OXA              | PIP                |
| WT   |             | MG1655ΔacrB                | pBAD33acrBhis                                 | 1024              | 4096               | 256              | 512               | 256              | 2                  |
| KO   |             | MG1655ΔacrB                | pBAD33                                        | 8                 | 32                 | 8                | 4                 | 1                | 0.125              |
| Pit  |             | MG1655ΔacrB                | pBAD33acrB(F136I)his                          | 1024              | <b><u>1024</u></b> | 128              | 1024              | 128              | 2                  |
|      |             | MG1655ΔacrB                | pBAD33acrB(F136G)his                          | <b><u>256</u></b> | <b><u>128</u></b>  | <b><u>64</u></b> | 256               | <b><u>32</u></b> | 1                  |
|      |             | MG1655ΔacrB                | pBAD33acrB(F628I)his                          | 512               | <b><u>256</u></b>  | 128              | 256               | <b><u>32</u></b> | 1                  |
|      |             | MG1655ΔacrB                | pBAD33acrB(F136G+F628I)his                    | <b><u>128</u></b> | <b><u>64</u></b>   | <b><u>16</u></b> | <b><u>64</u></b>  | <b><u>4</u></b>  | <b><u>0.25</u></b> |
| Loop |             | MG1655ΔacrB                | pBAD33acrB(F610E)his                          | 512               | <b><u>1024</u></b> | 128              | 256               | 128              | 1                  |
|      |             | MG1655ΔacrB                | pBAD33acrB(F610A)his                          | <b><u>128</u></b> | <b><u>256</u></b>  | <b><u>32</u></b> | <b><u>128</u></b> | <b><u>32</u></b> | <b><u>0.5</u></b>  |
|      |             | MG1655ΔacrB                | pBAD33acrB(F615M)his                          | 512               | 2048               | 128              | 256               | 128              | 1                  |
|      |             | MG1655ΔacrB                | pBAD33acrB(F617I)his                          | 1024              | 4096               | 128              | 1024              | 128              | 1                  |
|      | MG1655ΔacrB | pBAD33acrB(F615M+F617I)his | 512                                           | 4096              | <b><u>64</u></b>   | 256              | 128               | 0.5              |                    |

**Supplementary Table 2.** MIC data of several single and double AcrB-Ec hydrophobic pit mutations. Bold underlined shows an at least two dilution lowering in MIC, italic shows zero to one difference in MIC, compared to WT AcrB expressing cells. *EtBr* ethidium bromide, *R6G* Rhodamine6G, *EM* erythromycin, *MET* methicillin, *CEFP* cefcapene pivoxil, *CTX* ceftriaxone, *OXA* oxacillin, *PIP* piperacillin.

| Cluster | Organism                        | Transporter | Comparison to AcrB-Ec |         |      | Residues         |      |      |      |      |                       |     |     |      |      |      |      |                         |      |      |      |      |     |     |      |      |      |      |      |   |   |
|---------|---------------------------------|-------------|-----------------------|---------|------|------------------|------|------|------|------|-----------------------|-----|-----|------|------|------|------|-------------------------|------|------|------|------|-----|-----|------|------|------|------|------|---|---|
|         |                                 |             | Identity              | Similar | Gaps | Hydrophobic trap |      |      |      |      | Distal Binding Pocket |     |     |      |      |      |      | Proximal Binding Pocket |      |      |      |      |     |     |      |      |      |      |      |   |   |
|         |                                 |             |                       |         |      | F136             | F178 | F610 | F615 | F617 | F628                  | S46 | Q89 | S128 | E130 | Q176 | L177 | S180                    | E273 | N274 | I277 | V612 | S79 | T91 | S134 | S135 | K292 | L674 | D681 |   |   |
| 1       | <i>Escherichia coli</i>         | AcrB        | 100%                  | 100%    | 0%   |                  |      |      |      |      |                       |     |     |      |      |      |      |                         |      |      |      |      |     |     |      |      |      |      |      |   |   |
|         | <i>Escherichia coli</i>         | AcrF        | 78%                   | 88%     | 0%   |                  |      |      |      |      |                       |     | T   |      |      |      |      |                         | A    |      |      | V    |     |     |      |      |      |      |      |   |   |
|         | <i>Acinetobacter baumannii</i>  | AdeJ        | 58%                   | 75%     | 2%   |                  |      |      |      |      |                       | A   | S   | T    | T    |      |      |                         | V    | G    | D    |      | F   |     |      |      | Q    | A    |      |   | N |
| 2       | <i>Escherichia coli</i>         | AcrD        | 66%                   | 80%     | 0%   | N                | Y    |      | S    | P    |                       | T   | S   | R    | R    | D    |      | A                       |      |      | K    | Y    | I   |     |      | D    | T    |      |      |   |   |
|         | <i>Pseudomonas aeruginosa</i>   | MexB        | 71%                   | 84%     | 0%   |                  |      |      |      |      |                       | Q   | T   | R    | T    |      |      |                         | V    |      | Q    | D    |     |     |      |      | K    | N    |      |   |   |
|         | <i>Pseudomonas aeruginosa</i>   | MexD        | 49%                   | 67%     | 1%   |                  |      |      |      |      |                       | T   | E   | Q    |      |      |      |                         | F    |      | L    | F    | I   |     |      | E    | V    | A    | G    | P | A |
| 3       | <i>Pseudomonas aeruginosa</i>   | MexY        | 48%                   | 67%     | 1%   | I                | W    | Y    |      | L    |                       |     | S   | Y    |      | E    | I    | A                       | S    | E    | F    | F    | I   |     | K    | D    |      |      |      |   |   |
|         | <i>Acinetobacter baumannii</i>  | AdeB        | 49%                   | 68%     | 1%   |                  |      |      | I    | W    |                       |     | E   | Q    |      |      |      |                         | A    | Q    | A    | F    | I   |     |      |      | G    | Q    |      | S |   |
|         | <i>Haemophilus influenzae</i>   | AcrB        | 32%                   | 52%     | 4%   | G or I           |      |      | E    | M    | I                     | I   |     | -    |      | S    |      | V                       | A    |      |      | S    | S   |     |      |      | G    | N    | I    | P |   |
| 4       | <i>Legionella pneumophila</i>   | AcrB        | 32%                   | 52%     | 3%   | A                | L    |      | -    | -    | G                     | M   | T   | L    | K    | D    | I    | G                       |      | Q    |      | S    | S   |     | T    |      | T    | I    | -    | A |   |
|         | <i>Pasteurella multocida</i>    | AcrB        | 31%                   | 52%     | 4%   | G                |      |      | M    |      | V                     |     | -   | T    | S    |      | I    |                         | S    | S    | S    | S    | I   |     |      | G    | T    | N    | Q    | - |   |
|         | <i>Coxiella burnetii</i>        | AcrB        | 30%                   | 52%     | 4%   | -                | A    | V    |      | K    |                       |     | D   | Q    | G    | E    | V    | A                       | D    | S    | S    | S    |     |     | I    | K    | M    | E    | N    | - | E |
|         | <i>Photobacterium profundum</i> | AcrB        | 33%                   | 53%     | 3%   | A                | Y    |      |      |      | V                     | -   | T   | T    | T    | S    | D    |                         | G    | K    | S    |      |     |     |      | T    | T    | N    | -    | P |   |

**Supplementary Table 3.** Comparison of aligned residues belonging to the hydrophobic trap, distal binding pocket and proximal binding pocket of several MDR RND transporters. Residues are based on the co-crystal structures of AcrB-Ec and their substrates, thought to interact with moieties of the drug molecules. Green shows a conservation compared to AcrB-Ec's residues, blue indicates a similar substitution and red shows a different amino acid substitution. A bar with a white background indicates that no aligned residue was found. Alignment was performed by BLAST. Cluster numbers are to indicate the transporters belonging to different clusters. Precise clusters can be found in Fig. 2 or Supplementary Fig. 2 and 3.
